# Supplementary material
Source: Research Square preprint supplement (doi:10.21203/rs.3.rs-9521637/v1)

Graphic abstract


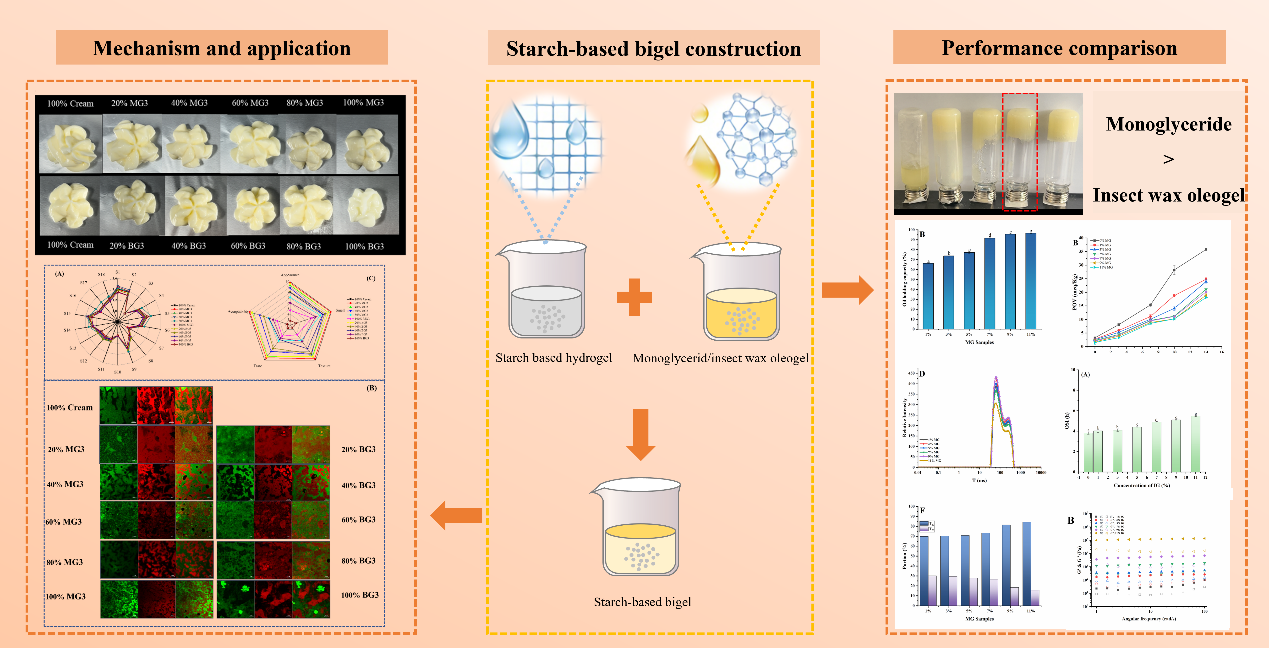

Supplement: Supplementary file 1 [file 8f746493ddee71124e3c55a1.docx]
